# Supplementary material
Source: Springer Nature journal article supplement (https://www.springermedizin.de/resource/supplementary/12888_2012_1320_MOESM3_ESM.pdf/9479884)
Supplement: MOESM3 [file 9479884]

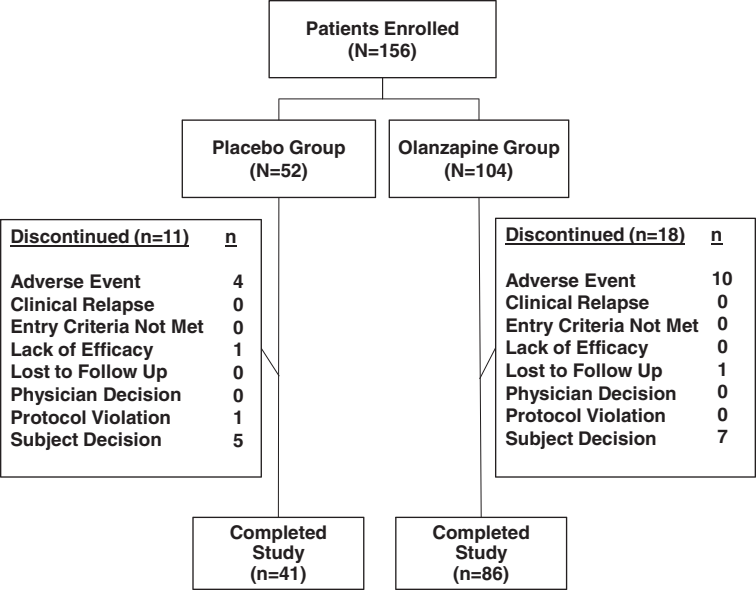

**Patients Enrolled  
(N=156)**

**Placebo Group  
(N=52)**

**Olanzapine Group  
(N=104)**

**Discontinued (n=11)**

n

|                        |   |
|------------------------|---|
| Adverse Event          | 4 |
| Clinical Relapse       | 0 |
| Entry Criteria Not Met | 0 |
| Lack of Efficacy       | 1 |
| Lost to Follow Up      | 0 |
| Physician Decision     | 0 |
| Protocol Violation     | 1 |
| Subject Decision       | 5 |

**Discontinued (n=18)**

n

|                        |    |
|------------------------|----|
| Adverse Event          | 10 |
| Clinical Relapse       | 0  |
| Entry Criteria Not Met | 0  |
| Lack of Efficacy       | 0  |
| Lost to Follow Up      | 1  |
| Physician Decision     | 0  |
| Protocol Violation     | 0  |
| Subject Decision       | 7  |

**Completed  
Study  
(n=41)**

**Completed  
Study  
(n=86)**
